# Supplementary material for: Structurally Observed Electrostatic Features of the COVID-19 Coronavirus-Related Experimental Structures inside Protein Data Bank: A Brief Update
Source: Preprints.org preprint supplement (doi:10.20944/preprints202003.0081.v1), 2020-03-05
Supplement: Supplementary file 1 [file supplementary]

# Extracting the Electrostatic Features from COVID-19 Coronavirus-Related Experimental Structures inside Protein Data Bank: Supplementary Materials

Wei Li\*

March 3, 2020

---

\*Institute of Special Environment Medicine, Nantong University, No. 9, Seyuan Road, Nantong City, Jiangsu Province, P. R. China

## List of Tables

|    |                                                                    |    |
|----|--------------------------------------------------------------------|----|
| 1  | Salt bridging network analysis . . . . .                           | 6  |
| 2  | Counting of salt bridges . . . . .                                 | 7  |
| 3  | Side chain and main chain hydrogen bonding analysis . . . . .      | 8  |
| 4  | Side chain hydrogen bonding analysis . . . . .                     | 9  |
| 5  | Interfacial salt bridging network analysis . . . . .               | 10 |
| 6  | Counting of interfacial salt bridges . . . . .                     | 11 |
| 7  | 6LU7-specific salt bridging network analysis . . . . .             | 12 |
| 8  | 6LVN-specific salt bridging network analysis . . . . .             | 13 |
| 9  | 6LXT-specific salt bridging network analysis . . . . .             | 14 |
| 10 | 6VSB-specific salt bridging network analysis . . . . .             | 16 |
| 11 | 6LVN-specific interfacial salt bridging network analysis . . . . . | 17 |
| 12 | 6LXT-specific interfacial salt bridging network analysis . . . . . | 18 |
| 13 | 6VSB-specific interfacial salt bridging network analysis . . . . . | 19 |

## Supporting Material

| PDB ID | Residue A  | Atom A | Residue B  | Atom B | Distance (Å) |
|--------|------------|--------|------------|--------|--------------|
| 6LU7   | A_LYS_5    | NZ     | A_GLU_288  | OE1    | 3.977        |
| 6LU7   | A_ARG_40   | NH2    | A_ASP_187  | OD1    | 3.040        |
| 6LU7   | A_ARG_40   | NH2    | A_ASP_187  | OD2    | 3.380        |
| 6LU7   | A_ARG_60   | NH2    | A_ASP_56   | OD2    | 3.978        |
| 6LU7   | A_ARG_76   | NH2    | A_ASP_92   | OD1    | 2.923        |
| 6LU7   | A_ARG_76   | NH2    | A_ASP_92   | OD2    | 3.767        |
| 6LU7   | A_ARG_105  | NH1    | A_ASP_176  | OD1    | 3.990        |
| 6LU7   | A_ARG_105  | NH1    | A_ASP_176  | OD2    | 2.771        |
| 6LU7   | A_ARG_131  | NH1    | A_ASP_289  | OD1    | 2.939        |
| 6LU7   | A_ARG_131  | NH1    | A_ASP_289  | OD2    | 2.873        |
| 6LU7   | A_ARG_131  | NH1    | A_GLU_290  | OE2    | 3.231        |
| 6LU7   | A_ARG_131  | NH2    | A_ASP_197  | OD2    | 3.526        |
| 6LU7   | A_ARG_131  | NH2    | A_ASP_289  | OD1    | 3.835        |
| 6LU7   | A_ARG_131  | NH2    | A_ASP_289  | OD2    | 2.581        |
| 6LU7   | A_LYS_137  | NZ     | A_ASP_197  | OD2    | 3.803        |
| 6LU7   | A_HIS_172  | NE2    | A_GLU_166  | OE2    | 2.896        |
| 6LU7   | A_ARG_298  | NH1    | A_ASP_295  | OD1    | 3.939        |
| 6LVN   | B_LYS_14   | NZ     | B_GLU_15   | OE2    | 3.711        |
| 6LVN   | B_ARG_18   | NH1    | B_GLU_15   | OE1    | 3.427        |
| 6LVN   | B_LYS_24   | NZ     | B_GLU_21   | OE1    | 3.825        |
| 6LVN   | B_LYS_24   | NZ     | B_GLU_21   | OE2    | 3.054        |
| 6LVN   | C_LYS_14   | NZ     | C_GLU_15   | OE2    | 2.916        |
| 6LVN   | C_ARG_18   | NH2    | C_GLU_15   | OE1    | 3.632        |
| 6LVN   | C_ARG_18   | NH2    | C_GLU_15   | OE2    | 2.854        |
| 6LVN   | C_LYS_24   | NZ     | C_GLU_28   | OE2    | 3.766        |
| 6LVN   | C_LYS_24   | NZ     | D_GLU_21   | OE1    | 3.613        |
| 6LVN   | C_LYS_24   | NZ     | D_GLU_21   | OE2    | 2.690        |
| 6LVN   | D_ARG_18   | NH2    | D_GLU_15   | OE1    | 3.866        |
| 6LVN   | D_ARG_18   | NH2    | D_GLU_15   | OE2    | 3.115        |
| 6LVN   | D_LYS_24   | NZ     | C_GLU_21   | OE1    | 3.756        |
| 6LVN   | D_LYS_24   | NZ     | C_GLU_21   | OE2    | 2.891        |
| 6LXT   | A_LYS_921  | NZ     | A_GLU_918  | OE2    | 3.662        |
| 6LXT   | A_LYS_947  | NZ     | C_GLU_1182 | OE1    | 2.868        |
| 6LXT   | A_LYS_947  | NZ     | C_GLU_1182 | OE2    | 3.665        |
| 6LXT   | A_ARG_983  | NH1    | C_ASP_985  | OD1    | 2.627        |
| 6LXT   | A_ARG_983  | NH1    | C_GLU_988  | OE1    | 3.658        |
| 6LXT   | A_ARG_983  | NH2    | C_ASP_985  | OD1    | 3.810        |
| 6LXT   | A_ARG_1185 | NH1    | B_ASP_936  | OD2    | 2.747        |
| 6LXT   | A_ARG_1185 | NH2    | B_ASP_936  | OD2    | 3.553        |
| 6LXT   | B_LYS_947  | NZ     | A_GLU_1182 | OE2    | 3.013        |
| 6LXT   | B_LYS_1191 | NZ     | F_ASP_936  | OD1    | 3.636        |
| 6LXT   | B_LYS_1191 | NZ     | F_ASP_936  | OD2    | 2.639        |
| 6LXT   | C_LYS_947  | NZ     | B_GLU_1182 | OE1    | 2.808        |
| 6LXT   | C_ARG_983  | NH1    | B_GLU_988  | OE2    | 3.205        |
| 6LXT   | C_ARG_1185 | NH2    | A_ASP_936  | OD2    | 3.479        |
| 6LXT   | C_LYS_1191 | NZ     | C_GLU_1188 | OE1    | 3.767        |
| 6LXT   | D_LYS_947  | NZ     | F_GLU_1182 | OE1    | 2.984        |
| 6LXT   | D_LYS_947  | NZ     | F_GLU_1182 | OE2    | 3.943        |
| 6LXT   | D_ARG_1185 | NH1    | D_GLU_1188 | OE2    | 2.798        |
| 6LXT   | D_ARG_1185 | NH2    | D_GLU_1188 | OE2    | 3.164        |
| 6LXT   | E_LYS_921  | NZ     | E_GLU_1202 | OE2    | 3.098        |
| 6LXT   | E_ARG_983  | NH1    | D_ASP_985  | OD1    | 3.405        |
| 6LXT   | E_LYS_1191 | NZ     | E_GLU_1188 | OE1    | 3.578        |
| 6LXT   | F_LYS_947  | NZ     | E_GLU_1182 | OE1    | 2.714        |
| 6LXT   | F_LYS_947  | NZ     | E_GLU_1182 | OE2    | 3.334        |
| 6LXT   | F_ARG_983  | NH1    | F_ASP_979  | OD2    | 3.887        |
| 6LXT   | F_ARG_983  | NH2    | F_ASP_979  | OD1    | 3.827        |

|      |            |     |            |     |       |
|------|------------|-----|------------|-----|-------|
| 6LXT | F_ARG.983  | NH2 | F_ASP.979  | OD2 | 3.090 |
| 6LXT | F_ARG.1185 | NH2 | D_ASP.936  | OD2 | 3.238 |
| 6LXT | F_LYS.1191 | NZ  | F_GLU.1188 | OE1 | 3.938 |
| 6VSB | A_ARG.34   | NH1 | A_GLU.191  | OE2 | 3.360 |
| 6VSB | A_ARG.44   | NH1 | A_ASP.40   | OD1 | 3.626 |
| 6VSB | A_ARG.44   | NH1 | A_ASP.40   | OD2 | 3.805 |
| 6VSB | A_ARG.44   | NH2 | A_ASP.40   | OD2 | 3.952 |
| 6VSB | A_LYS.195  | NZ  | A_ASP.53   | OD1 | 3.374 |
| 6VSB | A_LYS.195  | NZ  | A_ASP.53   | OD2 | 2.816 |
| 6VSB | A_LYS.206  | NZ  | A_GLU.224  | OE2 | 3.715 |
| 6VSB | A_LYS.310  | NZ  | A_ASP.663  | OD1 | 2.695 |
| 6VSB | A_LYS.310  | NZ  | A_ASP.663  | OD2 | 2.759 |
| 6VSB | A_ARG.319  | NH1 | B_ASP.737  | OD2 | 3.350 |
| 6VSB | A_ARG.319  | NH1 | B_ASP.745  | OD1 | 3.737 |
| 6VSB | A_ARG.509  | NH1 | A_ASP.442  | OD1 | 3.045 |
| 6VSB | A_ARG.509  | NH1 | A_ASP.442  | OD2 | 3.727 |
| 6VSB | A_LYS.537  | NZ  | A_GLU.324  | OE2 | 2.800 |
| 6VSB | A_LYS.557  | NZ  | A_ASP.568  | OD1 | 3.297 |
| 6VSB | A_LYS.557  | NZ  | A_ASP.568  | OD2 | 3.960 |
| 6VSB | A_LYS.557  | NZ  | A_ASP.574  | OD1 | 2.979 |
| 6VSB | A_LYS.557  | NZ  | A_ASP.574  | OD2 | 3.677 |
| 6VSB | A_ARG.567  | NH1 | A_ASP.571  | OD1 | 3.120 |
| 6VSB | A_ARG.567  | NH2 | A_ASP.571  | OD1 | 3.007 |
| 6VSB | A_LYS.733  | NZ  | A_ASP.775  | OD2 | 2.987 |
| 6VSB | A_ARG.815  | NH1 | A_ASP.820  | OD1 | 3.501 |
| 6VSB | A_ARG.995  | NH1 | B_ASP.994  | OD2 | 3.301 |
| 6VSB | A_ARG.995  | NH2 | B_ASP.994  | OD1 | 3.860 |
| 6VSB | A_ARG.995  | NH2 | B_ASP.994  | OD2 | 3.526 |
| 6VSB | A_ARG.1019 | NH1 | A_GLU.773  | OE1 | 3.451 |
| 6VSB | A_ARG.1019 | NH2 | A_GLU.780  | OE1 | 3.758 |
| 6VSB | A_LYS.1028 | NZ  | A_GLU.725  | OE1 | 3.331 |
| 6VSB | A_LYS.1028 | NZ  | A_GLU.725  | OE2 | 2.161 |
| 6VSB | A_ARG.1039 | NH2 | B_GLU.1031 | OE1 | 3.150 |
| 6VSB | A_ARG.1039 | NH2 | B_GLU.1031 | OE2 | 2.518 |
| 6VSB | A_HIS.1064 | NE2 | A_GLU.725  | OE1 | 2.548 |
| 6VSB | B_ARG.34   | NH1 | B_GLU.191  | OE2 | 2.687 |
| 6VSB | B_LYS.310  | NZ  | B_ASP.663  | OD2 | 3.794 |
| 6VSB | B_ARG.319  | NH1 | C_ASP.745  | OD2 | 2.995 |
| 6VSB | B_ARG.319  | NH2 | C_ASP.745  | OD2 | 2.259 |
| 6VSB | B_ARG.328  | NH2 | B_ASP.578  | OD2 | 3.954 |
| 6VSB | B_ARG.509  | NH1 | B_ASP.442  | OD1 | 3.397 |
| 6VSB | B_ARG.509  | NH1 | B_ASP.442  | OD2 | 3.796 |
| 6VSB | B_LYS.535  | NZ  | B_GLU.554  | OE2 | 2.837 |
| 6VSB | B_LYS.537  | NZ  | B_GLU.324  | OE1 | 2.302 |
| 6VSB | B_LYS.557  | NZ  | B_ASP.586  | OD2 | 3.831 |
| 6VSB | B_ARG.567  | NH1 | B_ASP.571  | OD1 | 3.851 |
| 6VSB | B_ARG.567  | NH1 | B_ASP.571  | OD2 | 2.777 |
| 6VSB | B_LYS.733  | NZ  | B_ASP.775  | OD1 | 3.456 |
| 6VSB | B_LYS.733  | NZ  | B_ASP.775  | OD2 | 2.384 |
| 6VSB | B_LYS.790  | NZ  | A_GLU.702  | OE1 | 3.843 |
| 6VSB | B_LYS.811  | NZ  | B_GLU.868  | OE2 | 2.474 |
| 6VSB | B_ARG.815  | NH1 | B_ASP.820  | OD1 | 3.410 |
| 6VSB | B_ARG.995  | NH1 | C_ASP.994  | OD1 | 3.764 |
| 6VSB | B_ARG.995  | NH1 | C_ASP.994  | OD2 | 3.877 |
| 6VSB | B_ARG.995  | NH2 | C_ASP.994  | OD1 | 3.426 |
| 6VSB | B_ARG.995  | NH2 | C_ASP.994  | OD2 | 2.571 |
| 6VSB | B_ARG.1019 | NH1 | B_GLU.773  | OE1 | 3.369 |
| 6VSB | B_ARG.1019 | NH1 | B_GLU.773  | OE2 | 2.567 |

|      |            |     |            |     |       |
|------|------------|-----|------------|-----|-------|
| 6VSB | B_LYS_1028 | NZ  | B_GLU_725  | OE1 | 3.341 |
| 6VSB | B_LYS_1028 | NZ  | B_GLU_725  | OE2 | 3.228 |
| 6VSB | B_ARG_1039 | NH1 | B_GLU_1031 | OE1 | 3.814 |
| 6VSB | B_ARG_1039 | NH2 | C_GLU_1031 | OE2 | 2.823 |
| 6VSB | B_HIS_1064 | NE2 | B_GLU_725  | OE2 | 3.061 |
| 6VSB | C_ARG_328  | NH2 | C_ASP_578  | OD2 | 3.702 |
| 6VSB | C_LYS_537  | NZ  | C_GLU_324  | OE2 | 2.513 |
| 6VSB | C_LYS_557  | NZ  | C_ASP_568  | OD1 | 3.721 |
| 6VSB | C_LYS_557  | NZ  | C_ASP_574  | OD2 | 2.504 |
| 6VSB | C_LYS_557  | NZ  | C_ASP_586  | OD1 | 3.989 |
| 6VSB | C_ARG_567  | NH1 | C_ASP_571  | OD2 | 3.485 |
| 6VSB | C_ARG_567  | NH2 | C_ASP_571  | OD2 | 3.926 |
| 6VSB | C_LYS_733  | NZ  | C_ASP_775  | OD1 | 3.495 |
| 6VSB | C_LYS_733  | NZ  | C_ASP_775  | OD2 | 2.262 |
| 6VSB | C_ARG_815  | NH2 | C_ASP_820  | OD1 | 3.789 |
| 6VSB | C_ARG_995  | NH2 | A_ASP_994  | OD1 | 3.992 |
| 6VSB | C_ARG_995  | NH2 | A_ASP_994  | OD2 | 3.052 |
| 6VSB | C_ARG_1019 | NH1 | B_GLU_1017 | OE2 | 3.054 |
| 6VSB | C_ARG_1019 | NH1 | C_GLU_773  | OE2 | 2.736 |
| 6VSB | C_ARG_1019 | NH2 | B_GLU_1017 | OE2 | 3.999 |
| 6VSB | C_LYS_1028 | NZ  | C_GLU_725  | OE1 | 2.906 |
| 6VSB | C_LYS_1028 | NZ  | C_GLU_725  | OE2 | 3.013 |
| 6VSB | C_ARG_1039 | NH2 | A_GLU_1031 | OE1 | 3.069 |
| 6VSB | C_ARG_1039 | NH2 | A_GLU_1031 | OE2 | 3.224 |
| 6VSB | C_HIS_1064 | NE2 | C_GLU_725  | OE1 | 2.847 |

Table 1: Salt bridging networks within the PDB entries. In this table, the residue naming scheme is **Chain ID\_residue name\_residue number**.

| Count | Residue A | Residue B |
|-------|-----------|-----------|
| 9     | ARG995    | ASP994    |
| 8     | LYS947    | GLU1182   |
| 6     | ARG567    | ASP571    |
| 6     | LYS24     | GLU21     |
| 6     | LYS1028   | GLU725    |
| 6     | ARG1039   | GLU1031   |
| 5     | ARG18     | GLU15     |
| 5     | LYS733    | ASP775    |
| 4     | ARG1019   | GLU773    |
| 4     | ARG509    | ASP442    |
| 4     | ARG1185   | ASP936    |
| 4     | ARG131    | ASP289    |
| 3     | LYS310    | ASP663    |
| 3     | ARG983    | ASP985    |
| 3     | ARG815    | ASP820    |
| 3     | LYS537    | GLU324    |
| 3     | LYS557    | ASP568    |
| 3     | ARG319    | ASP745    |
| 3     | LYS1191   | GLU1188   |
| 3     | HIS1064   | GLU725    |
| 3     | LYS557    | ASP574    |
| 3     | ARG44     | ASP40     |
| 3     | ARG983    | ASP979    |
| 2     | ARG34     | GLU191    |
| 2     | ARG983    | GLU988    |
| 2     | ARG1185   | GLU1188   |
| 2     | ARG76     | ASP92     |
| 2     | ARG105    | ASP176    |
| 2     | ARG328    | ASP578    |
| 2     | LYS1191   | ASP936    |
| 2     | LYS557    | ASP586    |
| 2     | ARG1019   | GLU1017   |
| 2     | ARG40     | ASP187    |
| 2     | LYS195    | ASP53     |
| 2     | LYS14     | GLU15     |
| 1     | LYS790    | GLU702    |
| 1     | ARG1019   | GLU780    |
| 1     | LYS206    | GLU224    |
| 1     | ARG131    | ASP197    |
| 1     | LYS137    | ASP197    |
| 1     | LYS5      | GLU288    |
| 1     | ARG319    | ASP737    |
| 1     | ARG60     | ASP56     |
| 1     | ARG131    | GLU290    |
| 1     | LYS921    | GLU1202   |
| 1     | LYS921    | GLU918    |
| 1     | LYS24     | GLU28     |
| 1     | LYS535    | GLU554    |
| 1     | HIS172    | GLU166    |
| 1     | LYS811    | GLU868    |
| 1     | ARG298    | ASP295    |

Table 2: Counting of salt bridges within the PDB entries in Table 1.

| PDB | Acceptor (A) | Donor (D) | Hydrogen (H) | D-A (Å) | H-A (Å) | $\angle ADH(^{\circ})$ |
|-----|--------------|-----------|--------------|---------|---------|------------------------|
|-----|--------------|-----------|--------------|---------|---------|------------------------|

Table 3: The side chain and main chain hydrogen bonding networks. In this table, the names of the PDB files correspond to the single NMR structural model split from the NMR ensemble, the residue naming scheme is **Chain ID\_residue name\_residue number**,  $\angle ADH$  represents the angle formed by acceptor (A), donor (D) and hydrogen (H) ( $\angle ADH$ ).



| PDB | Acceptor (A) | Donor (D) | Hydrogen (H) | D-A (Å) | H-A (Å) | $\angle ADH(^{\circ})$ |
|-----|--------------|-----------|--------------|---------|---------|------------------------|
|-----|--------------|-----------|--------------|---------|---------|------------------------|

Table 4: Side chain hydrogen bonding network analysis. In this table, the names of the PDB files correspond to the single NMR structural model split from the NMR ensemble, the residue naming scheme is **Chain ID\_residue name\_residue number**,  $\angle ADH$  represents the angle formed by acceptor (A), donor (D) and hydrogen (H) ( $\angle ADH$ ).

| PDB ID | Residue A  | Atom A | Residue B  | Atom B | Distance (Å) |
|--------|------------|--------|------------|--------|--------------|
| 6LVN   | C_LYS_24   | NZ     | D_GLU_21   | OE1    | 3.613        |
| 6LVN   | C_LYS_24   | NZ     | D_GLU_21   | OE2    | 2.690        |
| 6LVN   | D_LYS_24   | NZ     | C_GLU_21   | OE1    | 3.756        |
| 6LVN   | D_LYS_24   | NZ     | C_GLU_21   | OE2    | 2.891        |
| 6LXT   | A_LYS_947  | NZ     | C_GLU_1182 | OE1    | 2.868        |
| 6LXT   | A_LYS_947  | NZ     | C_GLU_1182 | OE2    | 3.665        |
| 6LXT   | A_ARG_983  | NH1    | C_ASP_985  | OD1    | 2.627        |
| 6LXT   | A_ARG_983  | NH1    | C_GLU_988  | OE1    | 3.658        |
| 6LXT   | A_ARG_983  | NH2    | C_ASP_985  | OD1    | 3.810        |
| 6LXT   | A_ARG_1185 | NH1    | B_ASP_936  | OD2    | 2.747        |
| 6LXT   | A_ARG_1185 | NH2    | B_ASP_936  | OD2    | 3.553        |
| 6LXT   | B_LYS_947  | NZ     | A_GLU_1182 | OE2    | 3.013        |
| 6LXT   | B_LYS_1191 | NZ     | F_ASP_936  | OD1    | 3.636        |
| 6LXT   | B_LYS_1191 | NZ     | F_ASP_936  | OD2    | 2.639        |
| 6LXT   | C_LYS_947  | NZ     | B_GLU_1182 | OE1    | 2.808        |
| 6LXT   | C_ARG_983  | NH1    | B_GLU_988  | OE2    | 3.205        |
| 6LXT   | C_ARG_1185 | NH2    | A_ASP_936  | OD2    | 3.479        |
| 6LXT   | D_LYS_947  | NZ     | F_GLU_1182 | OE1    | 2.984        |
| 6LXT   | D_LYS_947  | NZ     | F_GLU_1182 | OE2    | 3.943        |
| 6LXT   | E_ARG_983  | NH1    | D_ASP_985  | OD1    | 3.405        |
| 6LXT   | F_LYS_947  | NZ     | E_GLU_1182 | OE1    | 2.714        |
| 6LXT   | F_LYS_947  | NZ     | E_GLU_1182 | OE2    | 3.334        |
| 6LXT   | F_ARG_1185 | NH2    | D_ASP_936  | OD2    | 3.238        |
| 6VSB   | A_ARG_319  | NH1    | B_ASP_737  | OD2    | 3.350        |
| 6VSB   | A_ARG_319  | NH1    | B_ASP_745  | OD1    | 3.737        |
| 6VSB   | A_ARG_995  | NH1    | B_ASP_994  | OD2    | 3.301        |
| 6VSB   | A_ARG_995  | NH2    | B_ASP_994  | OD1    | 3.860        |
| 6VSB   | A_ARG_995  | NH2    | B_ASP_994  | OD2    | 3.526        |
| 6VSB   | A_ARG_1039 | NH2    | B_GLU_1031 | OE1    | 3.150        |
| 6VSB   | A_ARG_1039 | NH2    | B_GLU_1031 | OE2    | 2.518        |
| 6VSB   | B_ARG_319  | NH1    | C_ASP_745  | OD2    | 2.995        |
| 6VSB   | B_ARG_319  | NH2    | C_ASP_745  | OD2    | 2.259        |
| 6VSB   | B_LYS_790  | NZ     | A_GLU_702  | OE1    | 3.843        |
| 6VSB   | B_ARG_995  | NH1    | C_ASP_994  | OD1    | 3.764        |
| 6VSB   | B_ARG_995  | NH1    | C_ASP_994  | OD2    | 3.877        |
| 6VSB   | B_ARG_995  | NH2    | C_ASP_994  | OD1    | 3.426        |
| 6VSB   | B_ARG_995  | NH2    | C_ASP_994  | OD2    | 2.571        |
| 6VSB   | B_ARG_1039 | NH2    | C_GLU_1031 | OE2    | 2.823        |
| 6VSB   | C_ARG_995  | NH2    | A_ASP_994  | OD1    | 3.992        |
| 6VSB   | C_ARG_995  | NH2    | A_ASP_994  | OD2    | 3.052        |
| 6VSB   | C_ARG_1019 | NH1    | B_GLU_1017 | OE2    | 3.054        |
| 6VSB   | C_ARG_1019 | NH2    | B_GLU_1017 | OE2    | 3.999        |
| 6VSB   | C_ARG_1039 | NH2    | A_GLU_1031 | OE1    | 3.069        |
| 6VSB   | C_ARG_1039 | NH2    | A_GLU_1031 | OE2    | 3.224        |

Table 5: Interfacial salt bridging network analysis within the PDB entries. In this table, the residue naming scheme is **Chain ID\_residue name\_residue number**.

| Count | Residue A | Residue B |
|-------|-----------|-----------|
| 9     | ARG995    | ASP994    |
| 8     | LYS947    | GLU1182   |
| 5     | ARG1039   | GLU1031   |
| 4     | LYS24     | GLU21     |
| 4     | ARG1185   | ASP936    |
| 3     | ARG319    | ASP745    |
| 3     | ARG983    | ASP985    |
| 2     | ARG983    | GLU988    |
| 2     | ARG1019   | GLU1017   |
| 2     | LYS1191   | ASP936    |
| 1     | ARG319    | ASP737    |
| 1     | LYS790    | GLU702    |

Table 6: Counting of interfacial salt bridges within the PDB entries in Table 5.

| PDB ID | Residue A | Atom A | Residue B | Atom B | Distance (Å) |
|--------|-----------|--------|-----------|--------|--------------|
| 6LU7   | A_LYS_5   | NZ     | A_GLU_288 | OE1    | 3.977        |
| 6LU7   | A_ARG_40  | NH2    | A_ASP_187 | OD1    | 3.040        |
| 6LU7   | A_ARG_40  | NH2    | A_ASP_187 | OD2    | 3.380        |
| 6LU7   | A_ARG_60  | NH2    | A_ASP_56  | OD2    | 3.978        |
| 6LU7   | A_ARG_76  | NH2    | A_ASP_92  | OD1    | 2.923        |
| 6LU7   | A_ARG_76  | NH2    | A_ASP_92  | OD2    | 3.767        |
| 6LU7   | A_ARG_105 | NH1    | A_ASP_176 | OD1    | 3.990        |
| 6LU7   | A_ARG_105 | NH1    | A_ASP_176 | OD2    | 2.771        |
| 6LU7   | A_ARG_131 | NH1    | A_ASP_289 | OD1    | 2.939        |
| 6LU7   | A_ARG_131 | NH1    | A_ASP_289 | OD2    | 2.873        |
| 6LU7   | A_ARG_131 | NH1    | A_GLU_290 | OE2    | 3.231        |
| 6LU7   | A_ARG_131 | NH2    | A_ASP_197 | OD2    | 3.526        |
| 6LU7   | A_ARG_131 | NH2    | A_ASP_289 | OD1    | 3.835        |
| 6LU7   | A_ARG_131 | NH2    | A_ASP_289 | OD2    | 2.581        |
| 6LU7   | A_LYS_137 | NZ     | A_ASP_197 | OD2    | 3.803        |
| 6LU7   | A_HIS_172 | NE2    | A_GLU_166 | OE2    | 2.896        |
| 6LU7   | A_ARG_298 | NH1    | A_ASP_295 | OD1    | 3.939        |

Table 7: 6LU7-specific salt bridging network analysis. In this table, the residue naming scheme is **Chain ID\_residue name\_residue number**

| PDB ID | Residue A | Atom A | Residue B | Atom B | Distance (Å) |
|--------|-----------|--------|-----------|--------|--------------|
| 6LVN   | B.LYS_14  | NZ     | B.GLU_15  | OE2    | 3.711        |
| 6LVN   | B.ARG_18  | NH1    | B.GLU_15  | OE1    | 3.427        |
| 6LVN   | B.LYS_24  | NZ     | B.GLU_21  | OE1    | 3.825        |
| 6LVN   | B.LYS_24  | NZ     | B.GLU_21  | OE2    | 3.054        |
| 6LVN   | C.LYS_14  | NZ     | C.GLU_15  | OE2    | 2.916        |
| 6LVN   | C.ARG_18  | NH2    | C.GLU_15  | OE1    | 3.632        |
| 6LVN   | C.ARG_18  | NH2    | C.GLU_15  | OE2    | 2.854        |
| 6LVN   | C.LYS_24  | NZ     | C.GLU_28  | OE2    | 3.766        |
| 6LVN   | C.LYS_24  | NZ     | D.GLU_21  | OE1    | 3.613        |
| 6LVN   | C.LYS_24  | NZ     | D.GLU_21  | OE2    | 2.690        |
| 6LVN   | D.ARG_18  | NH2    | D.GLU_15  | OE1    | 3.866        |
| 6LVN   | D.ARG_18  | NH2    | D.GLU_15  | OE2    | 3.115        |
| 6LVN   | D.LYS_24  | NZ     | C.GLU_21  | OE1    | 3.756        |
| 6LVN   | D.LYS_24  | NZ     | C.GLU_21  | OE2    | 2.891        |

Table 8: 6LVN-specific salt bridging network analysis. In this table, the residue naming scheme is **Chain ID\_residue name\_residue number**

| PDB ID | Residue A  | Atom A | Residue B  | Atom B | Distance (Å) |
|--------|------------|--------|------------|--------|--------------|
| 6LXT   | A_LYS_921  | NZ     | A_GLU_918  | OE2    | 3.662        |
| 6LXT   | A_LYS_947  | NZ     | C_GLU_1182 | OE1    | 2.868        |
| 6LXT   | A_LYS_947  | NZ     | C_GLU_1182 | OE2    | 3.665        |
| 6LXT   | A_ARG_983  | NH1    | C ASP_985  | OD1    | 2.627        |
| 6LXT   | A_ARG_983  | NH1    | C_GLU_988  | OE1    | 3.658        |
| 6LXT   | A_ARG_983  | NH2    | C ASP_985  | OD1    | 3.810        |
| 6LXT   | A_ARG_1185 | NH1    | B ASP_936  | OD2    | 2.747        |
| 6LXT   | A_ARG_1185 | NH2    | B ASP_936  | OD2    | 3.553        |
| 6LXT   | B_LYS_947  | NZ     | A_GLU_1182 | OE2    | 3.013        |
| 6LXT   | B_LYS_1191 | NZ     | F ASP_936  | OD1    | 3.636        |
| 6LXT   | B_LYS_1191 | NZ     | F ASP_936  | OD2    | 2.639        |
| 6LXT   | C_LYS_947  | NZ     | B_GLU_1182 | OE1    | 2.808        |
| 6LXT   | C_ARG_983  | NH1    | B_GLU_988  | OE2    | 3.205        |
| 6LXT   | C_ARG_1185 | NH2    | A ASP_936  | OD2    | 3.479        |
| 6LXT   | C_LYS_1191 | NZ     | C_GLU_1188 | OE1    | 3.767        |
| 6LXT   | D_LYS_947  | NZ     | F_GLU_1182 | OE1    | 2.984        |
| 6LXT   | D_LYS_947  | NZ     | F_GLU_1182 | OE2    | 3.943        |
| 6LXT   | D_ARG_1185 | NH1    | D_GLU_1188 | OE2    | 2.798        |
| 6LXT   | D_ARG_1185 | NH2    | D_GLU_1188 | OE2    | 3.164        |
| 6LXT   | E_LYS_921  | NZ     | E_GLU_1202 | OE2    | 3.098        |
| 6LXT   | E_ARG_983  | NH1    | D ASP_985  | OD1    | 3.405        |
| 6LXT   | E_LYS_1191 | NZ     | E_GLU_1188 | OE1    | 3.578        |
| 6LXT   | F_LYS_947  | NZ     | E_GLU_1182 | OE1    | 2.714        |
| 6LXT   | F_LYS_947  | NZ     | E_GLU_1182 | OE2    | 3.334        |
| 6LXT   | F_ARG_983  | NH1    | F ASP_979  | OD2    | 3.887        |
| 6LXT   | F_ARG_983  | NH2    | F ASP_979  | OD1    | 3.827        |
| 6LXT   | F_ARG_983  | NH2    | F ASP_979  | OD2    | 3.090        |
| 6LXT   | F_ARG_1185 | NH2    | D ASP_936  | OD2    | 3.238        |
| 6LXT   | F_LYS_1191 | NZ     | F_GLU_1188 | OE1    | 3.938        |

Table 9: 6LXT-specific salt bridging network analysis. In this table, the residue naming scheme is **Chain ID.residue name.residue number**

| PDB ID | Residue A  | Atom A | Residue B  | Atom B | Distance (Å) |
|--------|------------|--------|------------|--------|--------------|
| 6VSB   | A_ARG_34   | NH1    | A_GLU_191  | OE2    | 3.360        |
| 6VSB   | A_ARG_44   | NH1    | A_ASP_40   | OD1    | 3.626        |
| 6VSB   | A_ARG_44   | NH1    | A_ASP_40   | OD2    | 3.805        |
| 6VSB   | A_ARG_44   | NH2    | A_ASP_40   | OD2    | 3.952        |
| 6VSB   | A_LYS_195  | NZ     | A_ASP_53   | OD1    | 3.374        |
| 6VSB   | A_LYS_195  | NZ     | A_ASP_53   | OD2    | 2.816        |
| 6VSB   | A_LYS_206  | NZ     | A_GLU_224  | OE2    | 3.715        |
| 6VSB   | A_LYS_310  | NZ     | A_ASP_663  | OD1    | 2.695        |
| 6VSB   | A_LYS_310  | NZ     | A_ASP_663  | OD2    | 2.759        |
| 6VSB   | A_ARG_319  | NH1    | B_ASP_737  | OD2    | 3.350        |
| 6VSB   | A_ARG_319  | NH1    | B_ASP_745  | OD1    | 3.737        |
| 6VSB   | A_ARG_509  | NH1    | A_ASP_442  | OD1    | 3.045        |
| 6VSB   | A_ARG_509  | NH1    | A_ASP_442  | OD2    | 3.727        |
| 6VSB   | A_LYS_537  | NZ     | A_GLU_324  | OE2    | 2.800        |
| 6VSB   | A_LYS_557  | NZ     | A_ASP_568  | OD1    | 3.297        |
| 6VSB   | A_LYS_557  | NZ     | A_ASP_568  | OD2    | 3.960        |
| 6VSB   | A_LYS_557  | NZ     | A_ASP_574  | OD1    | 2.979        |
| 6VSB   | A_LYS_557  | NZ     | A_ASP_574  | OD2    | 3.677        |
| 6VSB   | A_ARG_567  | NH1    | A_ASP_571  | OD1    | 3.120        |
| 6VSB   | A_ARG_567  | NH2    | A_ASP_571  | OD1    | 3.007        |
| 6VSB   | A_LYS_733  | NZ     | A_ASP_775  | OD2    | 2.987        |
| 6VSB   | A_ARG_815  | NH1    | A_ASP_820  | OD1    | 3.501        |
| 6VSB   | A_ARG_995  | NH1    | B_ASP_994  | OD2    | 3.301        |
| 6VSB   | A_ARG_995  | NH2    | B_ASP_994  | OD1    | 3.860        |
| 6VSB   | A_ARG_995  | NH2    | B_ASP_994  | OD2    | 3.526        |
| 6VSB   | A_ARG_1019 | NH1    | A_GLU_773  | OE1    | 3.451        |
| 6VSB   | A_ARG_1019 | NH2    | A_GLU_780  | OE1    | 3.758        |
| 6VSB   | A_LYS_1028 | NZ     | A_GLU_725  | OE1    | 3.331        |
| 6VSB   | A_LYS_1028 | NZ     | A_GLU_725  | OE2    | 2.161        |
| 6VSB   | A_ARG_1039 | NH2    | B_GLU_1031 | OE1    | 3.150        |
| 6VSB   | A_ARG_1039 | NH2    | B_GLU_1031 | OE2    | 2.518        |
| 6VSB   | A_HIS_1064 | NE2    | A_GLU_725  | OE1    | 2.548        |
| 6VSB   | B_ARG_34   | NH1    | B_GLU_191  | OE2    | 2.687        |
| 6VSB   | B_LYS_310  | NZ     | B_ASP_663  | OD2    | 3.794        |
| 6VSB   | B_ARG_319  | NH1    | C_ASP_745  | OD2    | 2.995        |
| 6VSB   | B_ARG_319  | NH2    | C_ASP_745  | OD2    | 2.259        |
| 6VSB   | B_ARG_328  | NH2    | B_ASP_578  | OD2    | 3.954        |
| 6VSB   | B_ARG_509  | NH1    | B_ASP_442  | OD1    | 3.397        |
| 6VSB   | B_ARG_509  | NH1    | B_ASP_442  | OD2    | 3.796        |
| 6VSB   | B_LYS_535  | NZ     | B_GLU_554  | OE2    | 2.837        |
| 6VSB   | B_LYS_537  | NZ     | B_GLU_324  | OE1    | 2.302        |
| 6VSB   | B_LYS_557  | NZ     | B_ASP_586  | OD2    | 3.831        |
| 6VSB   | B_ARG_567  | NH1    | B_ASP_571  | OD1    | 3.851        |
| 6VSB   | B_ARG_567  | NH1    | B_ASP_571  | OD2    | 2.777        |
| 6VSB   | B_LYS_733  | NZ     | B_ASP_775  | OD1    | 3.456        |
| 6VSB   | B_LYS_733  | NZ     | B_ASP_775  | OD2    | 2.384        |
| 6VSB   | B_LYS_790  | NZ     | A_GLU_702  | OE1    | 3.843        |
| 6VSB   | B_LYS_811  | NZ     | B_GLU_868  | OE2    | 2.474        |
| 6VSB   | B_ARG_815  | NH1    | B_ASP_820  | OD1    | 3.410        |
| 6VSB   | B_ARG_995  | NH1    | C_ASP_994  | OD1    | 3.764        |
| 6VSB   | B_ARG_995  | NH1    | C_ASP_994  | OD2    | 3.877        |
| 6VSB   | B_ARG_995  | NH2    | C_ASP_994  | OD1    | 3.426        |
| 6VSB   | B_ARG_995  | NH2    | C_ASP_994  | OD2    | 2.571        |
| 6VSB   | B_ARG_1019 | NH1    | B_GLU_773  | OE1    | 3.369        |
| 6VSB   | B_ARG_1019 | NH1    | B_GLU_773  | OE2    | 2.567        |
| 6VSB   | B_LYS_1028 | NZ     | B_GLU_725  | OE1    | 3.341        |
| 6VSB   | B_LYS_1028 | NZ     | B_GLU_725  | OE2    | 3.228        |

|      |            |     |            |     |       |
|------|------------|-----|------------|-----|-------|
| 6VSB | B_ARG.1039 | NH1 | B_GLU.1031 | OE1 | 3.814 |
| 6VSB | B_ARG.1039 | NH2 | C_GLU.1031 | OE2 | 2.823 |
| 6VSB | B_HIS.1064 | NE2 | B_GLU.725  | OE2 | 3.061 |
| 6VSB | C_ARG.328  | NH2 | C_ASP.578  | OD2 | 3.702 |
| 6VSB | C_LYS.537  | NZ  | C_GLU.324  | OE2 | 2.513 |
| 6VSB | C_LYS.557  | NZ  | C_ASP.568  | OD1 | 3.721 |
| 6VSB | C_LYS.557  | NZ  | C_ASP.574  | OD2 | 2.504 |
| 6VSB | C_LYS.557  | NZ  | C_ASP.586  | OD1 | 3.989 |
| 6VSB | C_ARG.567  | NH1 | C_ASP.571  | OD2 | 3.485 |
| 6VSB | C_ARG.567  | NH2 | C_ASP.571  | OD2 | 3.926 |
| 6VSB | C_LYS.733  | NZ  | C_ASP.775  | OD1 | 3.495 |
| 6VSB | C_LYS.733  | NZ  | C_ASP.775  | OD2 | 2.262 |
| 6VSB | C_ARG.815  | NH2 | C_ASP.820  | OD1 | 3.789 |
| 6VSB | C_ARG.995  | NH2 | A_ASP.994  | OD1 | 3.992 |
| 6VSB | C_ARG.995  | NH2 | A_ASP.994  | OD2 | 3.052 |
| 6VSB | C_ARG.1019 | NH1 | B_GLU.1017 | OE2 | 3.054 |
| 6VSB | C_ARG.1019 | NH1 | C_GLU.773  | OE2 | 2.736 |
| 6VSB | C_ARG.1019 | NH2 | B_GLU.1017 | OE2 | 3.999 |
| 6VSB | C_LYS.1028 | NZ  | C_GLU.725  | OE1 | 2.906 |
| 6VSB | C_LYS.1028 | NZ  | C_GLU.725  | OE2 | 3.013 |
| 6VSB | C_ARG.1039 | NH2 | A_GLU.1031 | OE1 | 3.069 |
| 6VSB | C_ARG.1039 | NH2 | A_GLU.1031 | OE2 | 3.224 |
| 6VSB | C_HIS.1064 | NE2 | C_GLU.725  | OE1 | 2.847 |

Table 10: 6VSB-specific salt bridging network analysis. In this table, the residue naming scheme is **Chain ID\_residue name\_residue number**



| PDB ID | Residue A | Atom A | Residue B | Atom B | Distance (Å) |
|--------|-----------|--------|-----------|--------|--------------|
| 6LVN   | C.LYS_24  | NZ     | D.GLU_21  | OE1    | 3.613        |
| 6LVN   | C.LYS_24  | NZ     | D.GLU_21  | OE2    | 2.690        |
| 6LVN   | D.LYS_24  | NZ     | C.GLU_21  | OE1    | 3.756        |
| 6LVN   | D.LYS_24  | NZ     | C.GLU_21  | OE2    | 2.891        |

Table 11: 6LVN-specific interfacial salt bridging network analysis. In this table, the residue naming scheme is **Chain ID\_residue name\_residue number**

| PDB ID | Residue A  | Atom A | Residue B  | Atom B | Distance (Å) |
|--------|------------|--------|------------|--------|--------------|
| 6LXT   | A_LYS_947  | NZ     | C_GLU_1182 | OE1    | 2.868        |
| 6LXT   | A_LYS_947  | NZ     | C_GLU_1182 | OE2    | 3.665        |
| 6LXT   | A_ARG_983  | NH1    | C_ASP_985  | OD1    | 2.627        |
| 6LXT   | A_ARG_983  | NH1    | C_GLU_988  | OE1    | 3.658        |
| 6LXT   | A_ARG_983  | NH2    | C_ASP_985  | OD1    | 3.810        |
| 6LXT   | A_ARG_1185 | NH1    | B_ASP_936  | OD2    | 2.747        |
| 6LXT   | A_ARG_1185 | NH2    | B_ASP_936  | OD2    | 3.553        |
| 6LXT   | B_LYS_947  | NZ     | A_GLU_1182 | OE2    | 3.013        |
| 6LXT   | B_LYS_1191 | NZ     | F_ASP_936  | OD1    | 3.636        |
| 6LXT   | B_LYS_1191 | NZ     | F_ASP_936  | OD2    | 2.639        |
| 6LXT   | C_LYS_947  | NZ     | B_GLU_1182 | OE1    | 2.808        |
| 6LXT   | C_ARG_983  | NH1    | B_GLU_988  | OE2    | 3.205        |
| 6LXT   | C_ARG_1185 | NH2    | A_ASP_936  | OD2    | 3.479        |
| 6LXT   | D_LYS_947  | NZ     | F_GLU_1182 | OE1    | 2.984        |
| 6LXT   | D_LYS_947  | NZ     | F_GLU_1182 | OE2    | 3.943        |
| 6LXT   | E_ARG_983  | NH1    | D_ASP_985  | OD1    | 3.405        |
| 6LXT   | F_LYS_947  | NZ     | E_GLU_1182 | OE1    | 2.714        |
| 6LXT   | F_LYS_947  | NZ     | E_GLU_1182 | OE2    | 3.334        |
| 6LXT   | F_ARG_1185 | NH2    | D_ASP_936  | OD2    | 3.238        |

Table 12: 6LXT-specific interfacial salt bridging network analysis. In this table, the residue naming scheme is **Chain ID\_residue name\_residue number**

| PDB ID | Residue A  | Atom A | Residue B  | Atom B | Distance (Å) |
|--------|------------|--------|------------|--------|--------------|
| 6VSB   | A_ARG_319  | NH1    | B_ASP_737  | OD2    | 3.350        |
| 6VSB   | A_ARG_319  | NH1    | B_ASP_745  | OD1    | 3.737        |
| 6VSB   | A_ARG_995  | NH1    | B_ASP_994  | OD2    | 3.301        |
| 6VSB   | A_ARG_995  | NH2    | B_ASP_994  | OD1    | 3.860        |
| 6VSB   | A_ARG_995  | NH2    | B_ASP_994  | OD2    | 3.526        |
| 6VSB   | A_ARG_1039 | NH2    | B_GLU_1031 | OE1    | 3.150        |
| 6VSB   | A_ARG_1039 | NH2    | B_GLU_1031 | OE2    | 2.518        |
| 6VSB   | B_ARG_319  | NH1    | C_ASP_745  | OD2    | 2.995        |
| 6VSB   | B_ARG_319  | NH2    | C_ASP_745  | OD2    | 2.259        |
| 6VSB   | B_LYS_790  | NZ     | A_GLU_702  | OE1    | 3.843        |
| 6VSB   | B_ARG_995  | NH1    | C_ASP_994  | OD1    | 3.764        |
| 6VSB   | B_ARG_995  | NH1    | C_ASP_994  | OD2    | 3.877        |
| 6VSB   | B_ARG_995  | NH2    | C_ASP_994  | OD1    | 3.426        |
| 6VSB   | B_ARG_995  | NH2    | C_ASP_994  | OD2    | 2.571        |
| 6VSB   | B_ARG_1039 | NH2    | C_GLU_1031 | OE2    | 2.823        |
| 6VSB   | C_ARG_995  | NH2    | A_ASP_994  | OD1    | 3.992        |
| 6VSB   | C_ARG_995  | NH2    | A_ASP_994  | OD2    | 3.052        |
| 6VSB   | C_ARG_1019 | NH1    | B_GLU_1017 | OE2    | 3.054        |
| 6VSB   | C_ARG_1019 | NH2    | B_GLU_1017 | OE2    | 3.999        |
| 6VSB   | C_ARG_1039 | NH2    | A_GLU_1031 | OE1    | 3.069        |
| 6VSB   | C_ARG_1039 | NH2    | A_GLU_1031 | OE2    | 3.224        |

Table 13: 6VSB-specific interfacial salt bridging network analysis. In this table, the residue naming scheme is **Chain ID\_residue name\_residue number**
